# Supplementary material for: Sulfobetaine methacrylate-functionalized graphene oxide-IR780 nanohybrids aimed at improving breast cancer phototherapy
Source: PubMed Central journal article supplement — RSC Adv. 2020 Oct 20;10(63):38621–30. doi: 10.1039/d0ra07508f (PMC9057306; doi:10.1039/d0ra07508f), 2020-10-20
Supplement: RA-010-D0RA07508F-s001.pdf [file RA-010-D0RA07508F-s001.pdf]

Supplementary Information

**Sulfobetaine methacrylate-functionalized graphene oxide-IR780  
nanohybrids aimed for improved breast cancer phototherapy**

Miguel M. Leitão<sup>a</sup>, Cátia G. Alves<sup>a</sup>, Duarte de Melo-Diogo<sup>a,\*</sup>, Rita Lima-Sousa<sup>a</sup>,  
André F. Moreira<sup>a</sup>, Ilídio J. Correia<sup>a,b,\*</sup>

<sup>a</sup> CICS-UBI – Centro de Investigação em Ciências da Saúde, Universidade da Beira Interior, 6200-506 Covilhã, Portugal.

<sup>b</sup> CIEPQPF – Departamento de Engenharia Química, Universidade de Coimbra, 3030-790 Coimbra, Portugal.

\* Corresponding Authors E-mail: [icorreia@ubi.pt](mailto:icorreia@ubi.pt) (Ilídio J. Correia) and [demelodiogo@fcsaude.ubi.pt](mailto:demelodiogo@fcsaude.ubi.pt) (Duarte de Melo-Diogo). Telephone: +351 275 329 055

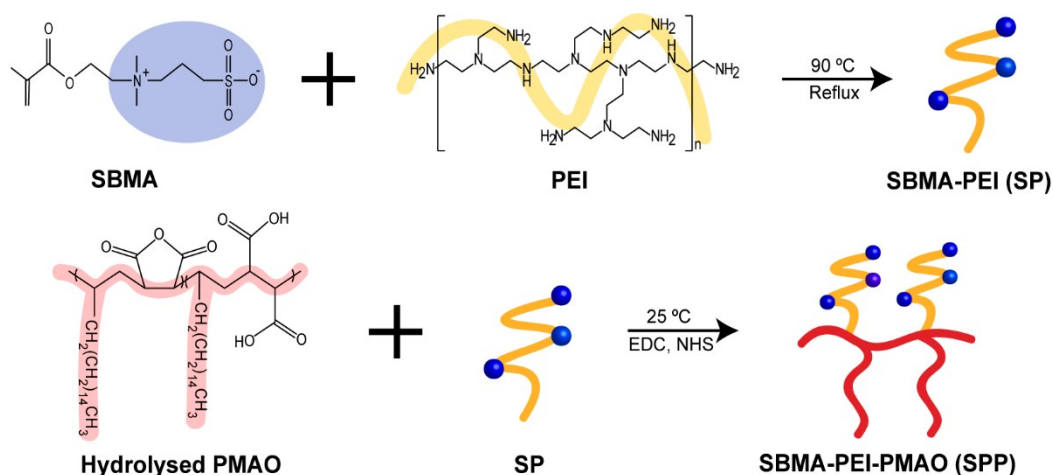

**Figure S1.** Schematic representation of the SP and SPP synthesis.

### FTIR characterization of SP, SPP and PP

The successful synthesis of SBMA-PEI (SP) and SBMA-PEI-PMAO (SPP) was confirmed by FTIR (Figure S2 and S3). The spectrum of SBMA has a peak at  $1035\text{ cm}^{-1}$  and  $1165\text{ cm}^{-1}$  corresponding to the S=O stretch (Figure S2). In turn, the PEI spectrum displays peaks at  $3347\text{--}3280\text{ cm}^{-1}$  (N-H stretch) and  $1594\text{ cm}^{-1}$  (N-H bending) - Figure S2 (1, 2). The spectrum of SP presents the SBMA and PEI characteristic peaks, hence confirming the grafting of SBMA into PEI (Figure S2).

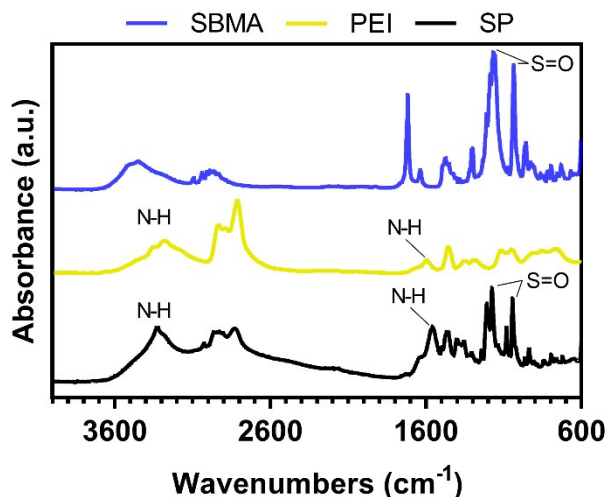

**Figure S2.** FTIR spectra of SBMA, PEI and SP.

The FTIR spectrum of hydrolysed PMAO displayed its characteristic peaks at 2920  $\text{cm}^{-1}$  and 2851  $\text{cm}^{-1}$  (C-H stretch) belonging mostly to its alkyl chain, as well as that at 1708  $\text{cm}^{-1}$  (C=O stretch) corresponding to the hydrolysed PMAO maleic anhydride ring - (Figure S3) (3). In turn, the FTIR spectrum of SPP presents the hydrolysed PMAO (C-H stretch) and SP (S=O stretch and N-H bending) signature peaks, hence confirming the conjugation of SP to hydrolysed PMAO (Figure S3).

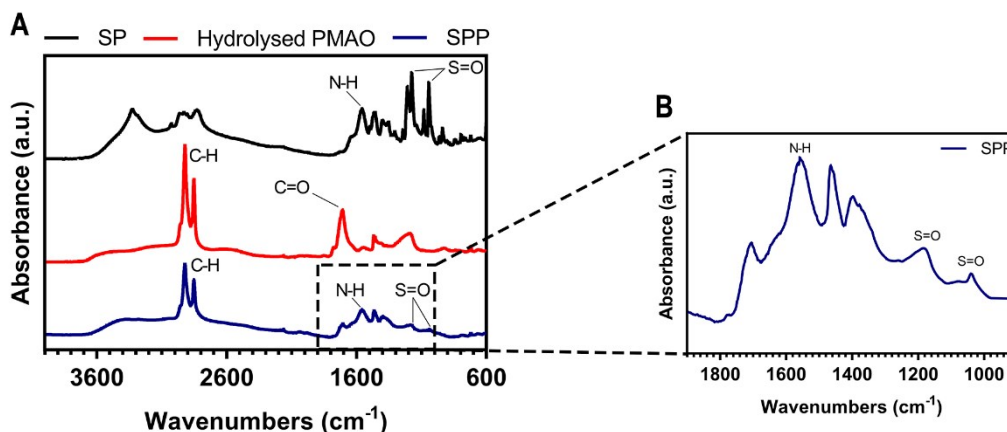

**Figure S3.** FTIR spectra of SP, hydrolysed PMAO and SPP (A). FTIR spectrum of SPP in the 1900–900  $\text{cm}^{-1}$  wavenumber range (B).

On the other hand, the PEI-PMAO (PP) FTIR spectrum displays the characteristic peaks of hydrolysed PMAO (C-H stretch) and of PEI (N-H bending), thereby proving its successful preparation (Figure S4).

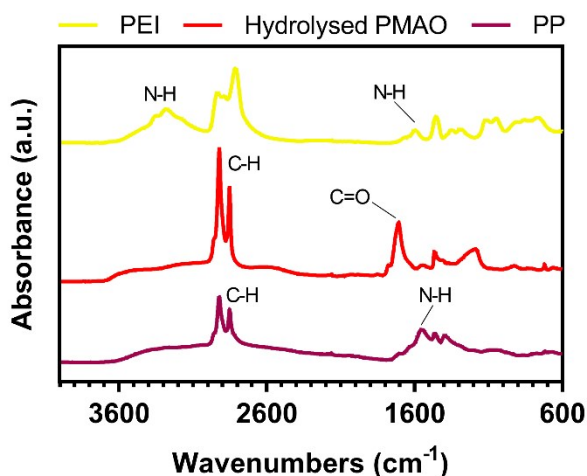

**Figure S4.** FTIR spectrum of PEI, hydrolysed PMAO and PP.

## NMR characterization of SP and SPP

The successful synthesis of SP was confirmed by  $^1\text{H}$  NMR (Figure S5). The  $^1\text{H}$  NMR spectrum of SBMA displayed the characteristic peaks of its methyl ( $\delta \approx 3.2$  ppm ( $-\text{N}(\text{CH}_3)_2-$ ) and methylene ( $\delta \approx 3.6$  ppm ( $-\text{CH}_2\text{N}(\text{CH}_3)_2-$ );  $\delta \approx 3.0$  ppm ( $-\text{CH}_2\text{SO}_3$ ) protons (Figure S5) (4). In turn, the spectrum of PEI presented several peaks at  $\delta \approx 2.8 - 2.5$  ppm belonging to its methylene protons ( $-\text{CH}_2\text{CH}_2-$ ) (5, 6). The spectrum of SP displays the SBMA and PEI characteristic peaks, hence confirming the grafting of SBMA into PEI (Figure S5).

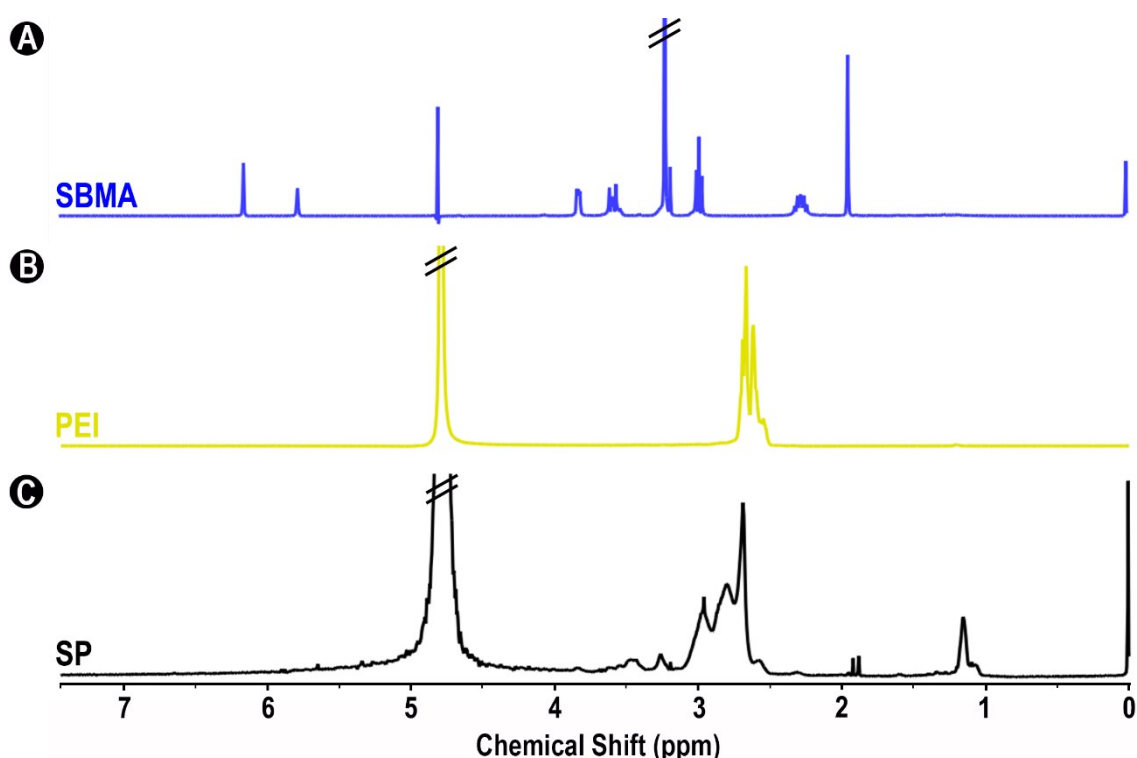

**Figure S5.**  $^1\text{H}$  NMR spectra of SBMA (A; in 9:1 (v/v)  $\text{H}_2\text{O}/\text{D}_2\text{O}$ ), PEI (B; in 9:1 (v/v)  $\text{H}_2\text{O}/\text{D}_2\text{O}$ ) and SP (C; in 9:1 (v/v)  $\text{H}_2\text{O}/\text{D}_2\text{O}$ ).

$^1\text{H}$  NMR was also employed to confirm the synthesis of SPP (Figure S6). The spectrum of hydrolysed PMAO presented signals from its methylene ( $\delta \approx 1.2$  ppm ( $-\text{CH}_2-$ ) and methyl ( $\delta \approx 0.8$  ppm ( $-\text{CH}_3$ ) protons (Figure S6) (3). In the spectrum of SPP, peaks belonging to SP and hydrolysed PMAO protons can be observed, hence confirming the preparation of SPP (Figure S6).

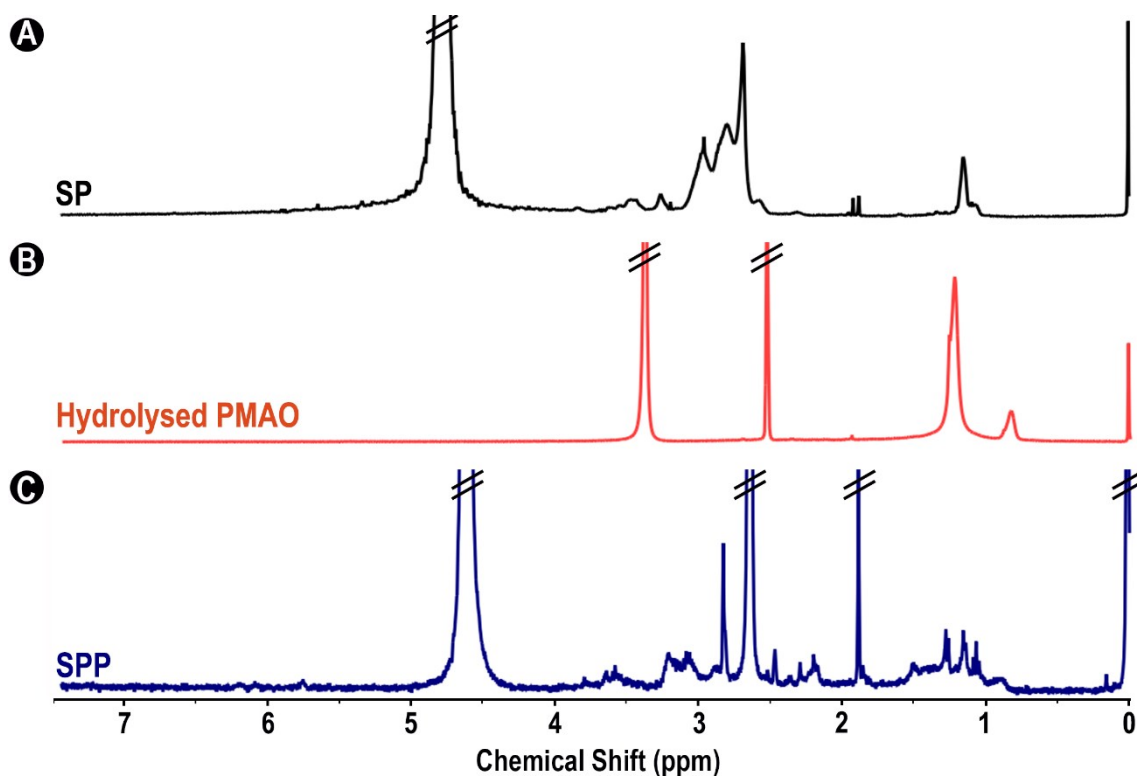

**Figure S6.**  $^1\text{H}$  NMR spectra of SP (A; in 9:1 (v/v)  $\text{H}_2\text{O}/\text{D}_2\text{O}$ ), hydrolysed PMAO (B; in  $\text{DMSO-d}_6$ ) and SPP (C; in 1:1 (v/v)  $\text{DMSO-d}_6/(9:1 \text{ (v/v) } \text{H}_2\text{O}/\text{D}_2\text{O})$ ).

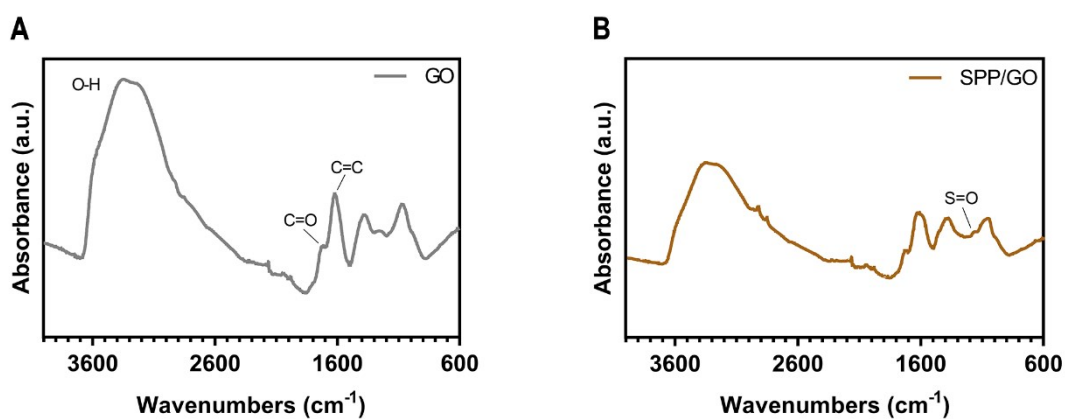

**Figure S7.** FTIR spectra of GO (A) and SPP/GO (B). The FTIR spectrum of GO displays peaks at 3350, 1715 and 1614  $\text{cm}^{-1}$  that are attributed to O-H, C=O and C=C stretches (7), respectively. In the FTIR spectrum of SPP/GO, a peak belonging to S=O (1177  $\text{cm}^{-1}$ ) is present.

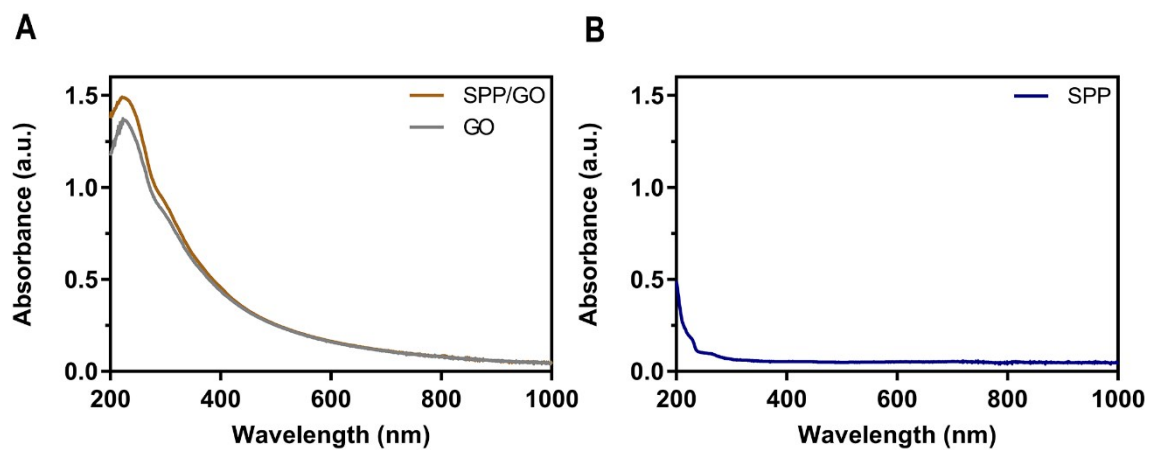

**Figure S8.** Absorption spectra of SPP/GO and GO (in water) (A). Absorption spectrum of SPP (in methanol) (B).

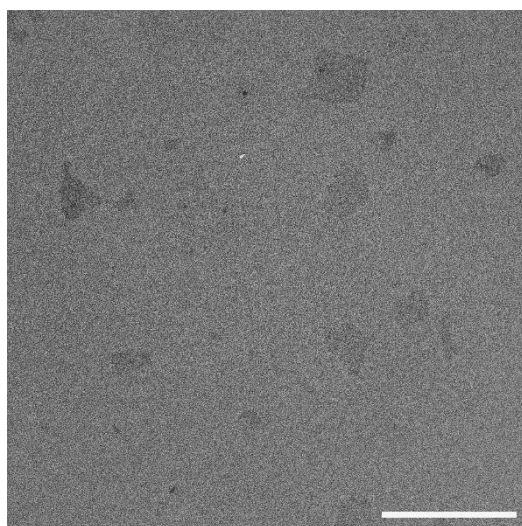

**Figure S9.** TEM image of SPP/GO. Scale bar corresponds to 500 nm.

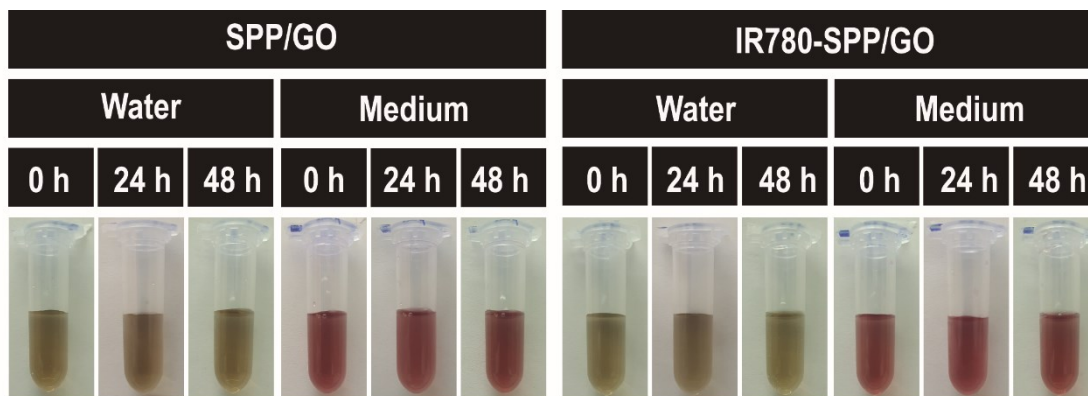

**Figure S10.** Macroscopic images of SPP/GO and IR780-SPP/GO in water and serum supplemented medium (DMEM-F12 supplemented with FBS (10 % (v/v))), at different time points.

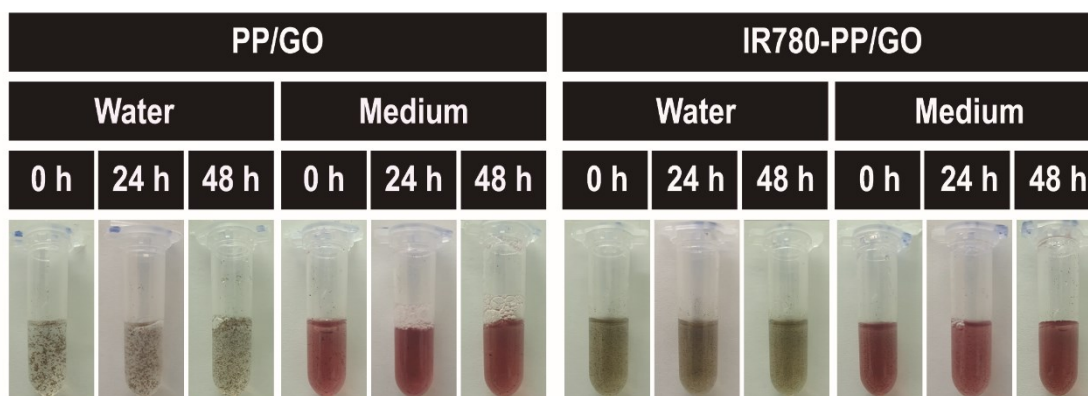

**Figure S11.** Macroscopic images of PP/GO and IR780-PP/GO in water and serum supplemented medium (DMEM-F12 supplemented with FBS (10 % (v/v))), at different time points.



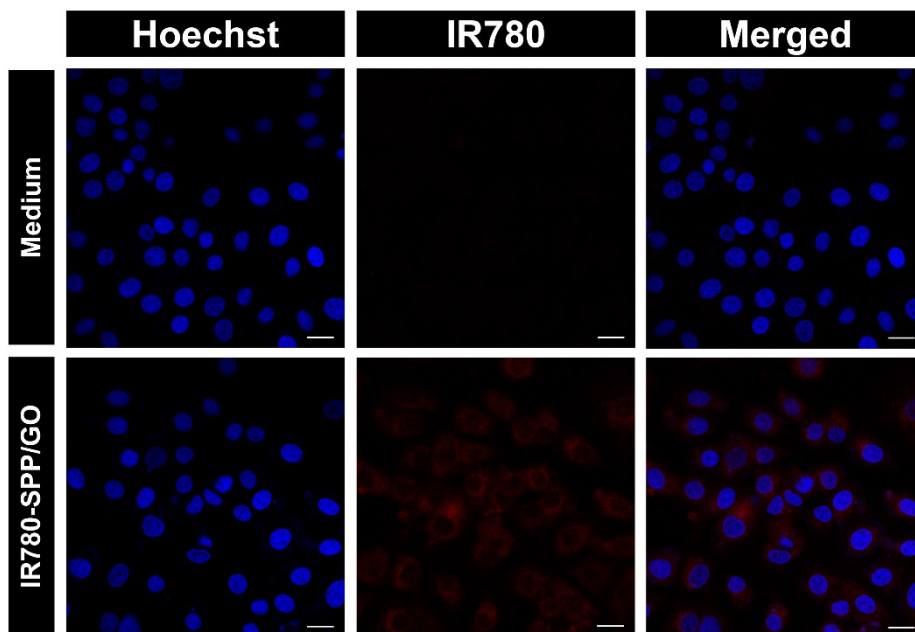

**Figure S12.** Cellular uptake of IR780-SPP/GO by MCF-7 cells. Cells solely incubated with medium were used as a control. Blue channel: Hoechst 33342<sup>®</sup> stained nucleus; Red channel: IR780. Scale bars correspond to 20  $\mu\text{m}$ .

## Supplementary References

1. Luo Z, Qi Q, Zhang L, Zeng R, Su L, Tang D. Branched polyethylenimine-modified upconversion nanohybrid-mediated photoelectrochemical immunoassay with synergistic effect of dual-purpose copper ions. *Analytical Chemistry*. 2019;91(6):4149-56.
2. Huang X, Ishitobi H, Inouye Y. Formation of fluorescent platinum nanoclusters using hyper-branched polyethylenimine and their conjugation to antibodies for bio-imaging. *RSC Advances*. 2016;6(12):9709-16.
3. Lima-Sousa R, de Melo-Diogo D, Alves CG, Costa EC, Ferreira P, Louro RO, et al. Hyaluronic acid functionalized green reduced graphene oxide for targeted cancer photothermal therapy. *Carbohydrate Polymers*. 2018;200:93-9.
4. Alves CG, de Melo-Diogo D, Lima-Sousa R, Correia IJ. IR780 loaded sulfobetaine methacrylate-functionalized albumin nanoparticles aimed for enhanced breast cancer phototherapy. *International Journal of Pharmaceutics*. 2020;582:119346.
5. Wang Y-Q, Su J, Wu F, Lu P, Yuan L-F, Yuan W-E, et al. Biscarbamate cross-linked polyethylenimine derivative with low molecular weight, low cytotoxicity, and high efficiency for gene delivery. *International Journal of Nanomedicine*. 2012;7:693.
6. Zhou B, Shen M, Bányai I, Shi X. Structural characterization of PEGylated polyethylenimine-entrapped gold nanoparticles: an NMR study. *Analyst*. 2016;141(18):5390-7.
7. de Melo-Diogo D, Pais-Silva C, Costa EC, Louro RO, Correia IJ. D- $\alpha$ -tocopheryl polyethylene glycol 1000 succinate functionalized nanographene oxide for cancer therapy. *Nanomedicine*. 2017;12(5):443-56.
